# Supplementary material for: IGFBP-2 acts as a tumour suppressor and plays a role in determining chemosensitivity in bladder cancer cells
Source: PubMed Central journal article supplement (PMC6925026; doi:10.18632/oncotarget.27355), 2019-12-17
Supplement: oncotarget-10-7043-s001.pdf [file oncotarget-10-7043-s001.pdf]

## IGFBP-2 acts as a tumour suppressor and plays a role in determining chemosensitivity in bladder cancer cells

### SUPPLEMENTARY MATERIALS

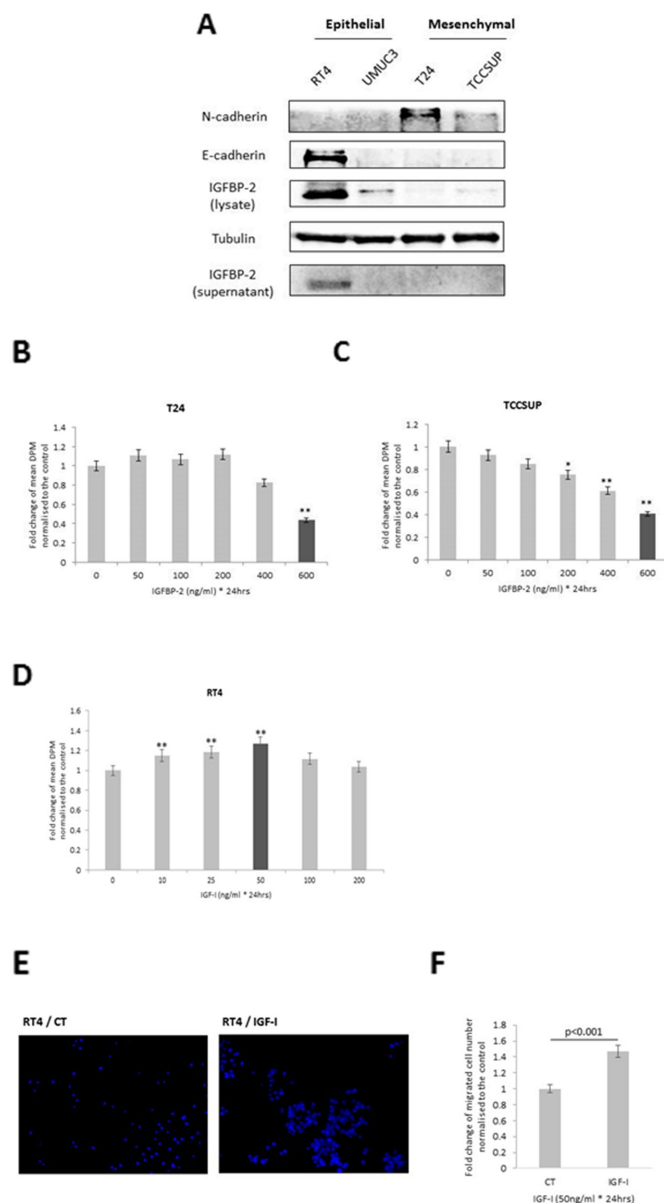

**Supplementary Figure 1:** (A) Western blots to indicate the levels of E- and N-cadherin and IGFBP-2 in a panel of bladder cancer cell lines, including RT4, UMUC3, T24 and TCCSUP. (B & C) Graphs show the effects of IGFBP-2 (0-600 ng/ml) on the proliferation of T24 and TCCSUP respectively. (D) Graph shows the effect of IGF-I (0-200 ng/ml) on the proliferation of RT4 cells. (E & F) Image shows invaded RT4 cells with the nuclei stained with DAPI (in blue); X 10 magnification and the graph indicates the mean change in number of invaded cells. Graphs show the mean and SEM of data from 3 separate experiments each performed in triplicate. Data were analysed with SPSS 12.0.1 for Windows using one-way ANOVA followed by least significant difference (LSD) post-hoc test. A statistically significant difference was present at  $p < 0.05$ .
